# Supplementary material for: Pharmacometabolic Effects of Pteryxin and Valproate on Pentylenetetrazole-Induced Seizures in Zebrafish Reveal Vagus Nerve Stimulation
Source: MDPI journal article supplement (doi:10.3390/cells12111540), 2023-06-04
Supplement: s1 [file s1]

# Pharmacometabolic effects of pteryxin and valproate on pentylenetetrazole-induced seizures in zebrafish reveal vagus nerve stimulation

Adriana Skiba<sup>1</sup>, Daniele Pellegata<sup>2</sup>, Veronika Morozova<sup>2</sup>, Ewelina Koziol<sup>1</sup>, Barbara Budzyńska<sup>3</sup>, Simon Ming-Yuen Lee<sup>4</sup>, Jürg Gertsch<sup>2</sup>, Krystyna Skalicka-Woźniak<sup>1</sup>

<sup>1</sup> *Department of Chemistry of Natural Products, Medical University of Lublin, Poland*

<sup>2</sup> *Institute of Biochemistry and Molecular Medicine, University of Bern, Switzerland*

<sup>3</sup> *Independent Laboratory of Behavioral Studies, Medical University of Lublin, Poland*

<sup>4</sup> *State Key Laboratory of Quality Research in Chinese Medicine and Institute of Chinese Medical Sciences, University of Macau, Macao, China*

## Chemicals used to quantify amino acids and neurotransmitters in zebrafish larvae samples

(Compound name and abbreviation; Stock solution concentration and Solvent)

All chemicals and reagents used for LC-MS/MS were obtained from Sigma Aldrich were of the purest analytical HPLC grade.

|         |                            | [Stock]<br>mg/ml | Solvent                                              |
|---------|----------------------------|------------------|------------------------------------------------------|
| Ach     | Acetylcholine              | 0.01             | MeOH                                                 |
| Dop     | Dopamine                   | 1                | MeOH + 1 mM EDTA in ddH <sub>2</sub> O (1:1)         |
| GSH     | Glutathione                | 10               | <b>1 mM EDTA in ddH<sub>2</sub>O (1:1)</b>           |
| Leu     | Leucine                    | 2                | MeOH + ddH <sub>2</sub> O (1:1)                      |
| Phe     | Phenylalanine              | 2                | MeOH + ddH <sub>2</sub> O (1:1)                      |
| Arg     | Arginine                   | 2                | MeOH + ddH <sub>2</sub> O (1:1)                      |
| Lys     | Lysine                     | 2                | MeOH + 1 mM EDTA in ddH <sub>2</sub> O (1:1)         |
| Eta     | Ethanolamine               | 2                | MeOH                                                 |
| Ala     | Alanine                    | 2                | MeOH + ddH <sub>2</sub> O (1:1)                      |
| Cys     | Cysteine                   | 4                | MeOH + 1 mM EDTA in ddH <sub>2</sub> O (1:1)         |
| Tyr     | Tyrosine                   | 2                | MeOH + 1 M HCl 1 mM EDTA in ddH <sub>2</sub> O (1:1) |
| Ado     | Adenosine                  | 2                | MeOH + 1 mM EDTA in ddH <sub>2</sub> O (1:1)         |
| Gly     | Glycine                    | 20               | MeOH + 1 M HCl 1 mM EDTA in ddH <sub>2</sub> O (1:1) |
| His     | Histidine                  | 1                | MeOH + 1 mM EDTA in ddH <sub>2</sub> O (1:1)         |
| Met     | Methionine                 | 2                | MeOH + ddH <sub>2</sub> O (1:1)                      |
| Tau     | Taurine                    | 4                | MeOH + ddH <sub>2</sub> O (1:1)                      |
| L-Dopa  | 3,4-dihydroxyphenylalanine | 4                | MeOH + 1 M HCl 1 mM EDTA in ddH <sub>2</sub> O (1:1) |
| GABA    | 4-aminobutyric acid        | 2                | MeOH + ddH <sub>2</sub> O (1:1)                      |
| NA      | Norepinephrine             | 2                | MeOH + ddH <sub>2</sub> O (1:1)                      |
| Pro     | Proline                    | 2                | MeOH + ddH <sub>2</sub> O (1:1)                      |
| Ser     | Serine                     | 1                | MeOH + ddH <sub>2</sub> O (1:1)                      |
| Trp     | Tryptophan                 | 2                | MeOH + ddH <sub>2</sub> O (1:1)                      |
| Asn     | Asparagine (ASN)           | 2                | MeOH + 1 M HCl 1 mM EDTA in ddH <sub>2</sub> O (1:1) |
| Asp     | Aspartate (ASP)            | 2                | MeOH + 1 M HCl 1 mM EDTA in ddH <sub>2</sub> O (1:1) |
| Choline | Choline                    | 0.2              | MeOH + 1 mM EDTA in ddH <sub>2</sub> O (1:1)         |
| Epi     | Epinephrine                | 2                | MeOH + 1 M HCl 1 mM EDTA in ddH <sub>2</sub> O (1:1) |
| Glu     | Glutamate (GLU)            | 2                | MeOH + 1 M HCl 1 mM EDTA in ddH <sub>2</sub> O (1:1) |
| Gln     | Glutamine (GLN)            | 2                | MeOH + 1 mM EDTA in ddH <sub>2</sub> O (1:1)         |
| Val     | Valine                     | 2                | MeOH + ddH <sub>2</sub> O (1:1)                      |
| 5HT     | Serotonin                  | 1                | MeOH + 1 mM EDTA in ddH <sub>2</sub> O (1:1)         |

### **Selection of selected internal standards and grouping:**

Ethanolamine\_d4, dopamine\_d4, methionine\_d3, serine\_d3, lysine\_d4 glycine\_d5 were purchased from Eurisotop France. Acetylcholine\_d4 was purchased from Sigma Aldrich. The below standards were used to quantified analytes shown in brackets:

|                  |                                          |
|------------------|------------------------------------------|
| ETHANOLAMINE-D4  | (ethanolamine, GABA, GSH, ADO)           |
| DOPAMINE-D4      | (dopamine, NE, Epin, L-DOPA, 5HT)        |
| METHIONINE-D3    | (MET, TRP, TYR, PHE, LEU, VAL, ALA, TAU) |
| SERINE-D3        | (SER, GLU, GLN, ASP, ASN)                |
| LYSINE-D4        | (LYS, ARG, HIS)                          |
| GLYCINE-D5       | (GLY, PRO, CYS)                          |
| Acetylcholine-D4 | (Ach, Ch)                                |

**Table S1** Multiple Reaction Monitoring (MRM) transitions used for quantification of the analytes

| Analyte | Precursor ion (m/z) | Product Ion (m/z) | Polarity |
|---------|---------------------|-------------------|----------|
| Ach     | 146.10              | 87.10             | Positive |
| DA      | 154.00              | 137.30            | Positive |
| 5HT     | 177.10              | 160.30            | Positive |
| LEU     | 132.10              | 86.10             | Positive |
| LYS     | 147.10              | 84.10             | Positive |
| PHE     | 166.10              | 120.30            | Positive |
| GSH     | 308.20              | 179.10            | Positive |
| ETA     | 62.00               | 44.00             | Positive |
| ARG     | 175.10              | 69.90             | Positive |
| CYS     | 122.10              | 76.10             | Positive |
| VAL     | 118.00              | 72.10             | Positive |
| ALA     | 90.00               | 44.00             | Positive |
| TYR     | 182.10              | 136.20            | Positive |
| ADO     | 268.20              | 136.20            | Positive |
| GLY     | 76.00               | 30.10             | Positive |
| HIS     | 156.10              | 110.10            | Positive |
| MET     | 150.10              | 104.20            | Positive |
| TAU     | 126.00              | 108.00            | Positive |
| LDOPA   | 198.10              | 152.20            | Positive |
| GABA    | 104.00              | 87.00             | Positive |
| NE      | 152.10              | 107.00            | Positive |
| PRO     | 116.00              | 70.00             | Positive |
| SER     | 106.00              | 60.00             | Positive |
| TRP     | 205.10              | 188.10            | Positive |
| Ch      | 104.10              | 60.10             | Positive |
| Epi     | 166.10              | 107.00            | Positive |
| ASN     | 133.00              | 73.90             | Positive |
| ASP     | 134.00              | 74.00             | Positive |
| GLU     | 148.10              | 84.00             | Positive |
| GLN     | 147.10              | 130.10            | Positive |

| Internal Standard | Precursor ion (m/z) | Product Ion (m/z) | Polarity |
|-------------------|---------------------|-------------------|----------|
| Ach-d4            | 150.00              | 91.00             | Positive |
| Ethan-d4          | 66.00               | 48.00             | Positive |
| GLY-d5            | 78.00               | 32.10             | Positive |
| DA-d4             | 158.10              | 141.10            | Positive |
| Meth-d3           | 153.10              | 107.00            | Positive |
| Lys-d4            | 151.20              | 88.00             | Positive |
| Ser-d3            | 109.00              | 63.00             | Positive |

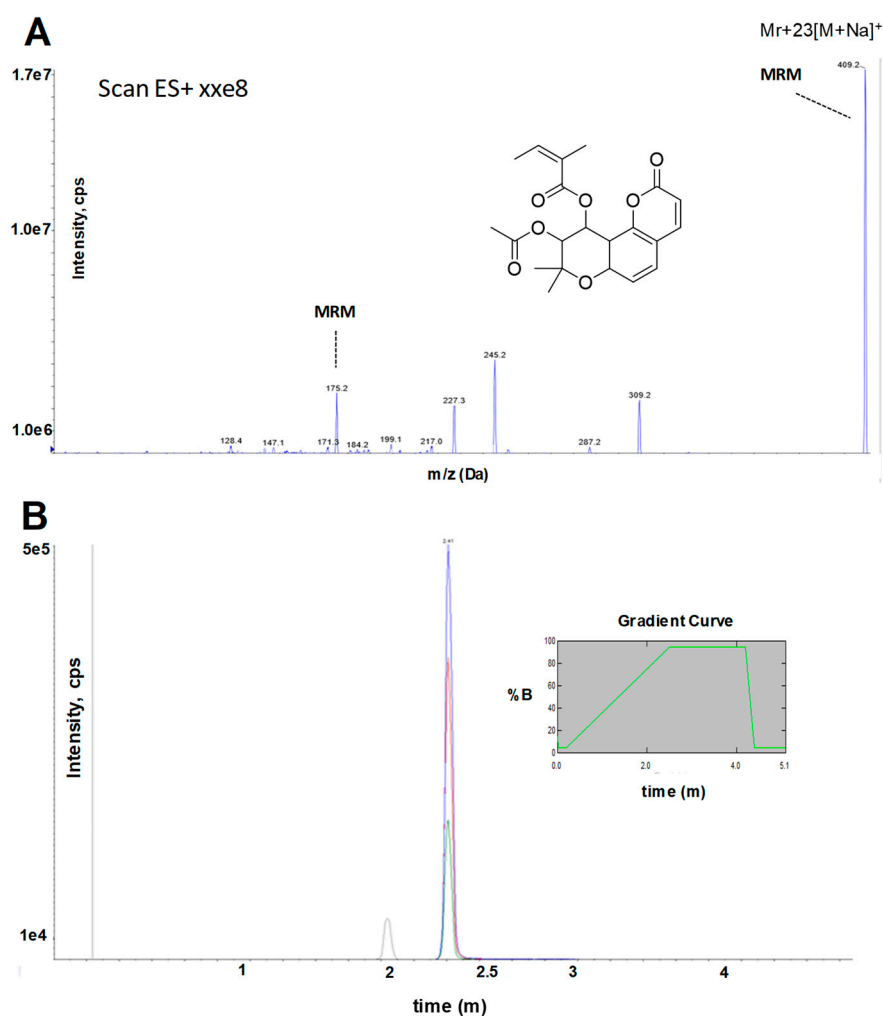

**Figure S1. (A)** Product-ion scan spectra and proposed multiple reaction monitoring (MRM) transitions of PTX. PTX and IS (rolipram) were scanned with ESI positive and negative ion modes following analyses of standard solutions. In different ionization modes, the base peak intensity of positive ion was higher than that of negative ion. The ESI mass spectrum showed that the molecular ion  $[M + Na]^+$  of PTX was at  $m/z$  409.3. The intensity of the ion at  $m/z$  409.3 was compared at fragmentor voltages of 40, 50, 80, 100, 120 and 150 V to determine the optimal collision energy. **(B)** Chromatograph using all MS transitions showing the internal standard (2 min) and PTX (2.3 min) in zebrafish larvae homogenate after 1h of PTX treatment. The insert shows the gradient curve used (see methods).

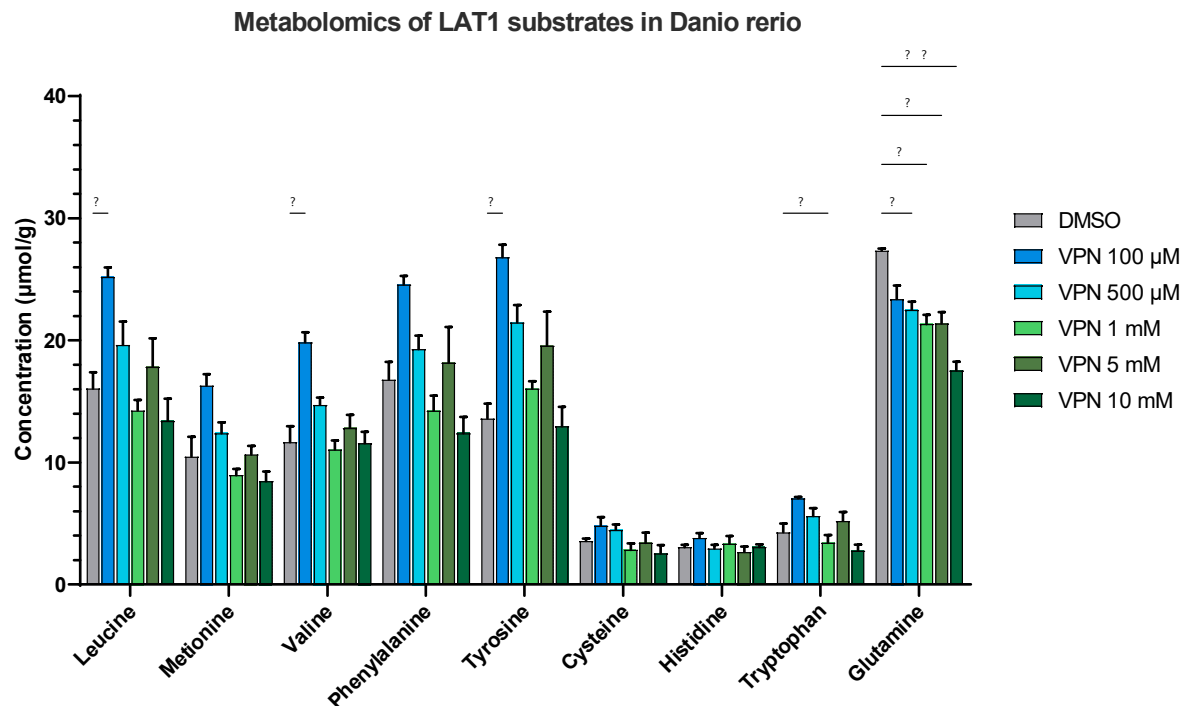

**Figure S2. VPN increases LAT1 substrates levels *in vivo*.** Metabolomics of LAT1 substrates in *Danio rerio* quantified by LC-MS/MS. Data are shown as mean  $\pm$  SD of triplicates. Statistical significance was calculated using two-way ANOVA and Dunnett's post hoc test. \* p-value <0.05, \*\* p-value <0.01, when compared to DMSO control group.

### Metabolomics of LAT1 substrates in *Danio rerio*

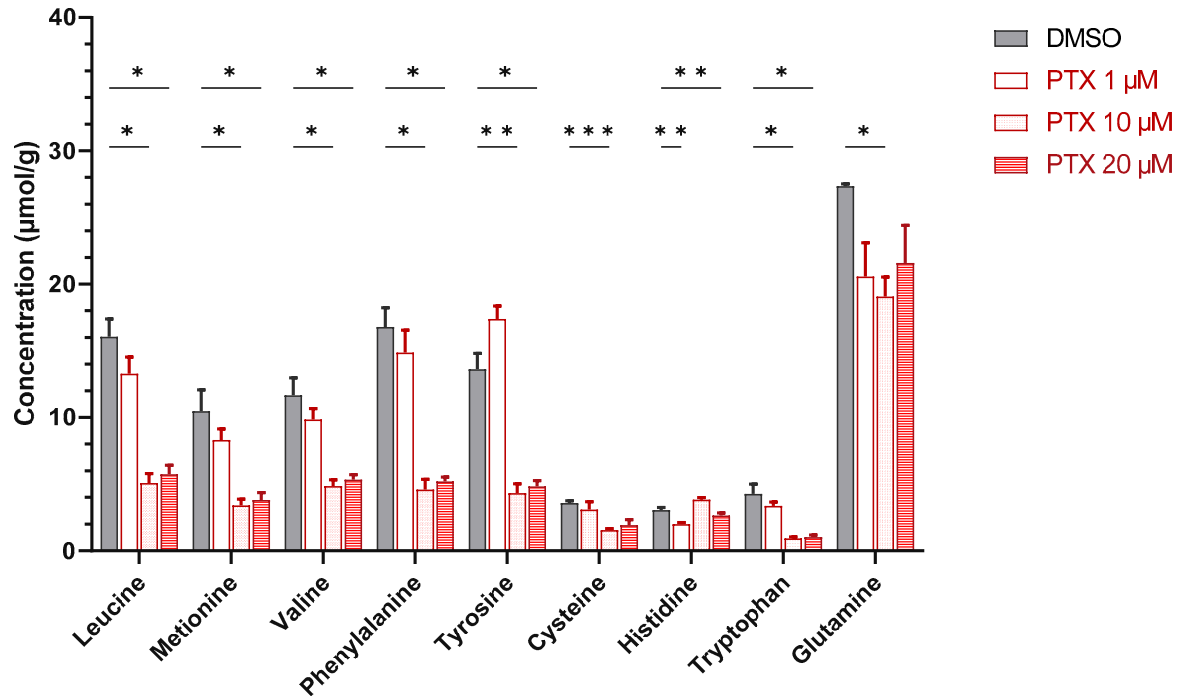

**Figure S3. VPN increases LAT1 substrate levels in vivo.** Metabolomics of LAT1 substrates in *Danio rerio* quantified by LC-MS/MS. Data are shown as mean  $\pm$  SD of triplicates. Statistical significance was calculated using two-way ANOVA and Dunnett's post hoc test. \* p-value < 0.05, \*\* p-value < 0.01, when compared to the DMSO control group.

### $[^3\text{H}]$ -L-Leucine uptake in MDST8-LAT1 cells

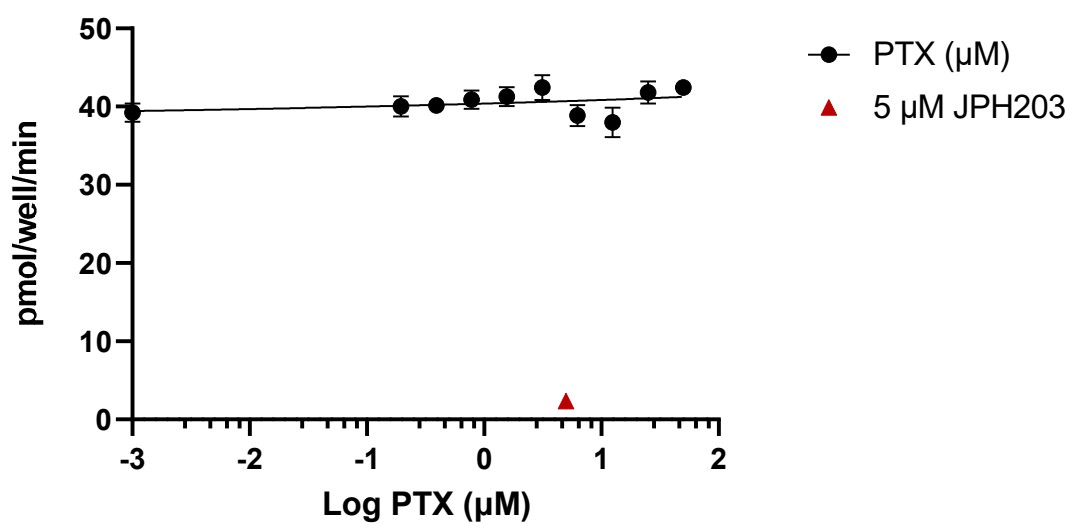

$\text{IC}_{50} (\text{PTX}) = \geq 50 \mu\text{M}$

**Figure S4.**  $[^3\text{H}]$ -L-leucine uptake inhibition by PTX in MDST8-LAT1 cells. Dose-response inhibition by PTX, starting at 50  $\mu\text{M}$  and inhibition by 5  $\mu\text{M}$  JPH203. Preincubation with PTX for 2 hours. The  $\text{IC}_{50}$  for PTX was determined using the four-parameter logistic to fit the dose-response curve in GraphPad Prism 9. Data shown as mean  $\pm$  SEM of triplicate wells from three independent experiments.



### **[<sup>3</sup>H]-L-Leucine uptake assay**

[<sup>3</sup>H]-L-Leucine uptake assay was performed as previously described [Yan *et al.*, 2021]. Cells were seeded in 96-well plates with opaque bottom (Corning, 353296) at 40-60% confluency, allowing them to attach for 48 hours in a fully supplemented media. Cells were preincubated with different concentrations of PTX for 2 hours, then the cells were washed three times with pre-warmed Na<sup>+</sup>-free Hank's Balanced Salt Solution (HBSS) containing 125 mM choline-Cl, 25 mM HEPES, 4.8 mM KCl, 1.2 mM MgSO<sub>4</sub>, 1.2 mM KH<sub>2</sub>PO<sub>4</sub>, 1.3 mM CaCl<sub>2</sub> and 5.6 mM D-glucose (pH 7.4) and further incubated with the same solution for 7 minutes at 37°C. [<sup>3</sup>H]-l-Leucine uptake was assessed in the same solution containing 10 nM "hot" [<sup>3</sup>H]-L-Leucine (60 Ci/mmol) (Anawa, 0140A-1) + 30 μM "cold" L-leucine. In case of 5 μM JPH203, the same procedure was followed without PTX preincubation. After 3 minutes, the solution was removed, and the cells were washed with ice-cold Na<sup>+</sup>-free HBSS to terminate the uptake. Cells were lysed with scintillation solvent MicroScint-20 (Perkin-Elmer Life Sciences, 6013621) and the radioactivity was measured with a scintillation counter (TopCount NXT, Perkin-Elmer Life Sciences).

\*Yan R, Li Y, Müller J, Zhang Y, Singer S, Xia L, Zhong X, Gertsch J, Altmann KH, Zhou Q. Mechanism of substrate transport and inhibition of the human LAT1-4F2hc amino acid transporter. *Cell Discov.* 2021 Mar 23;7(1):16. doi: 10.1038/s41421-021-00247-4. PMID: 33758168; PMCID: PMC7988154
